# Supplementary material for: Predicting and preventing postconcussive problems in paediatrics (5P) study: protocol for a prospective multicentre clinical prediction rule derivation study in children with concussion
Source: PubMed Central journal article supplement — BMJ Open. 2013 Aug 1;3(8):e003550. doi: 10.1136/bmjopen-2013-003550 (PMC3733307; doi:10.1136/bmjopen-2013-003550), 2013-08-01
Supplement: bmjopen-2013-003550.draft_revisions.pdf [file bmjopen-2013-003550.draft_revisions.pdf]

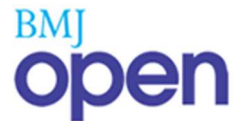

**Predicting and Preventing Postconcussive Problems in Pediatrics (5P) study: protocol for a prospective multicentre clinical prediction rule derivation study in children with concussion**

|                                 |                                                                                                                                                                                                                                                                                                                                                                                                                                                      |
|---------------------------------|------------------------------------------------------------------------------------------------------------------------------------------------------------------------------------------------------------------------------------------------------------------------------------------------------------------------------------------------------------------------------------------------------------------------------------------------------|
| Journal:                        | <i>BMJ Open</i>                                                                                                                                                                                                                                                                                                                                                                                                                                      |
| Manuscript ID:                  | bmjopen-2013-003550                                                                                                                                                                                                                                                                                                                                                                                                                                  |
| Article Type:                   | Protocol                                                                                                                                                                                                                                                                                                                                                                                                                                             |
| Date Submitted by the Author:   | 04-Jul-2013                                                                                                                                                                                                                                                                                                                                                                                                                                          |
| Complete List of Authors:       | Zemek, Roger; University of Ottawa, Departments of Pediatrics and Emergency Medicine; Children's Hospital of Eastern Ontario Research Institute,<br>Osmond, Martin; University of Ottawa, Departments of Pediatrics and Emergency Medicine; Children's Hospital of Eastern Ontario Research Institute,<br>Barrowman, Nick; Children's Hospital of Eastern Ontario Research Institute,<br>PERC, Concussion Team; Pediatric Emergency Research Canada, |
| <b>Primary Subject Heading</b>: | Emergency medicine                                                                                                                                                                                                                                                                                                                                                                                                                                   |
| Secondary Subject Heading:      | Paediatrics, Sports and exercise medicine, Epidemiology                                                                                                                                                                                                                                                                                                                                                                                              |
| Keywords:                       | ACCIDENT & EMERGENCY MEDICINE, EPIDEMIOLOGY, SPORTS MEDICINE, PAEDIATRICS, Paediatric A&E and ambulatory care < PAEDIATRICS, Paediatric neurology < PAEDIATRICS                                                                                                                                                                                                                                                                                      |
|                                 |                                                                                                                                                                                                                                                                                                                                                                                                                                                      |

SCHOLARONE™  
Manuscripts

Predicting and Preventing Postconcussive Problems in Pediatrics (5P) study: protocol for a prospective multicentre clinical prediction rule derivation study in children with concussion

Roger Zemek, MD<sup>1,2,\*</sup> email: rzemek@cheo.on.ca  
Martin Osmond, MD<sup>1,2</sup> email: mosmond@cheo.on.ca  
Nick Barrowman, PhD<sup>2</sup> email: nbarrowman@cheo.on.ca  
on behalf of the the Pediatric Emergency Research Canada (PERC) Concussion Team

<sup>1</sup> Departments of Pediatrics and Emergency Medicine, University of Ottawa

<sup>2</sup> Children's Hospital of Eastern Ontario Research Institute

\* corresponding author

**Pediatric Emergency Research Canada (PERC) Concussion Team:**

Peter Anderson, PhD, Children's Hospital of Eastern Ontario, Psychology  
Karen Barlow, MD, Alberta Children's Hospital, Pediatric Neurology,  
Miriam Beauchamp, PhD University of Montreal, Psychology  
Darcy Beer, MD, Manitoba Children's , Pediatric Emergency  
Kathy Boutis, MD, Hospital for Sick Children, Pediatric Emergency  
Brian Brooks, PhD, Alberta Children's Hospital, Psychology  
Emma Burns, MD, IWK, Pediatric Emergency  
William Craig, MD, Stollery, Pediatric Emergency  
Carol DeMatteo, Msc, McMaster University, School of Rehabilitation Science  
Sasha Dubrovsky, MD, Montreal Children's Hospital, Pediatric Emergency  
Ken Farion, MD Children's Hospital of Eastern Ontario, Pediatric Emergency  
Stephen Freedman, MD, Alberta Children's Hospital, Pediatric Emergency  
Isabelle Gagnon, PhD, Montreal Children's Hospital, Department of Pediatrics  
Jocelyn Gravel, MD, Hospital Ste. Justine, Pediatric Emergency  
Blaine Hoshisaki, PhD, University of Ottawa, Kinesiology  
Michelle Keightley, PhD, University of Toronto, Psychology  
Terry Klassen, MD, Manitoba, Pediatric Emergency  
William Meehan, MD, Harvard University, Sports medicine  
Willem Meeuwisse, MD, University of Calgary, Sports medicine  
Angelo Mikrogianakis, MD, Alberta Children's Hospital, Pediatric Emergency  
Lawrence Richer, MD, Stollery, Pediatric Neurology  
Gurinder Sangha, MD, London, Pediatric Emergency  
Mike Vassilyadi, MD, Children's Hospital of Eastern Ontario, Pediatric Neurology

**Keywords:** ACCIDENT & EMERGENCY MEDICINE, EPIDEMIOLOGY, SPORTS MEDICINE, PAEDIATRICALS, Paediatric A&E and ambulatory care < PAEDIATRICALS, Paediatric neurology < PAEDIATRICALS

## Abstract

**Introduction:** Persistent post-concussive symptoms is the persistence of somatic, cognitive, physical, psychological and/or behavioural changes lasting more than one month following concussion. Persistent concussion impacts quality of life through impaired cognition, memory and attention affecting school performance, mood and social engagement. No large epidemiological studies have determined the true prevalence of persistent concussion symptoms. Validated, easy-to-use prognosticators do not exist for clinicians to identify children at highest risk. The goal of Predicting and Preventing Post-concussive Problems in Pediatrics study is to derive a clinical prediction rule for the development of persistent post-concussion symptoms in children and adolescents presenting to emergency department following acute head injury.

**Methods and Analysis:** This study is a prospective, multicentre cohort study across 9 academic Canadian pediatric emergency departments. We will recruit the largest prospective epidemiological cohort of children with concussion. Eligible children will be followed using Post-Concussion Symptom Inventory, a validated tool in children as young as 5 years. Patients will follow-up at 1-,2-,4-,8- and 12-weeks post injury. The main outcome will be presence/absence of PCS defined as three or more persistent concussion symptoms one month following the injury. 1792 patients provides adequate power to derive a clinical decision rule using multivariate analyses to find predictor variables sensitive for detecting cases of persistent post-concussion symptoms.

**Ethics and dissemination:** Results of this large prospective study will enable clinicians to identify children at highest risk, optimize treatment and provide families with realistic and appropriate anticipatory guidance. Ethics has been obtained through the Children's Hospital of Eastern Ontario Research Ethics Board. Results will be disseminated at international conferences and in four manuscripts to peer reviewed journals.

**Trial registration:** This study is registered at Clinicaltrials.gov through the United States National Institute of Health/National Library of Medicine (NCT01873287; <http://clinicaltrials.gov/ct2/show/NCT01873287>).

## Article Summary

### Article focus

- This article describes the protocol for the development of a clinical prediction rule to determine those children and adolescents at high risk for developing Persistent Post-Concussion Symptoms (PCS).

### Key messages

- Validated, easy-to-use prognosticators do not exist for clinicians to identify children at highest risk for PCS.
- Physicians currently cannot accurately inform children and parents whether they should expect longer symptoms, nor initiate pharmacotherapy or other management to reduce the occurrence or severity of PCS.

### Strengths and limitations of the study

- This work will be the largest epidemiological study on pediatric concussion and will provide rigorous evidence to determine PCS incidence in children and its impact on quality of life.
- The results of this large multi-centre study will enable clinicians to identify children at highest risk for PCS, optimize treatment and provide families with realistic anticipatory guidance.
- Not all children with acute concussions report to pediatric emergency department which may affect applicability to other settings.

### INTRODUCTION

After years of minimizing the impact of concussion, there is now recognition that there is nothing at all mild about mild traumatic brain injury.<sup>1,2</sup> Concussion, a “mild” traumatic brain injury common in children and adolescents, is a complex pathophysiological process affecting the brain induced by traumatic biomechanical forces.<sup>3</sup> Recent estimates reveal that 1 in 220 pediatric emergency department (ED) visits is for concussion yielding 700,000 pediatric concussion ED visits annually in the United States.<sup>4,5,6</sup> Census data across eight pediatric EDs across Canada suggest a higher incidence of 1 in 70 pediatric ED visits is for concussion. Center for Disease Control statistics demonstrate that the majority of concussions occur in children and young adults.<sup>7</sup>

While many children improve within two weeks post-concussion, symptoms may persist for months and even years, with children and adolescents at highest risk.<sup>3,8,9,10,11</sup> When children and adolescents suffer persistent somatic, cognitive, psychological, and/or behavioural changes for one month duration or longer following a concussion, it is referred to as persistent post-concussive symptoms (PCS).<sup>12</sup> No large epidemiological studies have determined the true prevalence, but the literature suggest up to 59% of children are still symptomatic one-month following concussion.<sup>13-15</sup> PCS impacts the quality of life for both the patient and the entire family resulting in school absenteeism, emotional changes, and loss of peer activities.<sup>9,16,17</sup> Children with PCS may miss weeks or even months out of the school-year, affecting marks and jeopardizing promotion to the next grade.<sup>2,3</sup> In PCS, cognition may be slowed, attention and memory impaired, making schoolwork a challenge upon return to school, resulting in de novo educational interventions.<sup>9,18,19</sup>

The lay press has become inundated with high-profile athletes suffering tragic consequences following concussion, highlighting an increased risk of dementia, chronic traumatic encephalopathy and suicide.<sup>1</sup> Children are not immune to life-altering consequences following concussion.<sup>20-22</sup> Repeated concussions suffered during school-aged years have the potential for permanent cognitive dysfunction and neuropsychiatric problems and there is evidence indicating that sustaining one concussion leads to an increased risk of sustaining others.<sup>23-29</sup> We need rigorous evidence, beyond anecdotal speculation, about the impact of PCS on the quality of life for children and families. Clinical prediction rules are necessary to determine who will most benefit from future interventional studies designed to reduce the frequency and severity of PCS versus the current standard treatment of rest.<sup>3,30,31</sup>

1  
2  
3  
4  
5  
6  
7  
8  
9  
10  
11  
12  
13  
14  
15  
16  
17  
18  
19  
20  
21  
22  
23  
24  
25  
26  
27  
28  
29  
30  
31  
32  
33  
34  
35  
36  
37  
38  
39  
40  
41  
42  
43  
44  
45  
46  
47  
48  
49  
50  
51  
52  
53  
54  
55  
56  
57  
58  
59  
60

A recent systematic review confirmed validated, easy-to-use prognosticators do not exist for clinicians to identify children with concussion who are at highest risk for PCS and sequelae.<sup>30</sup> Physicians do not have the ability to accurately inform children and parents about symptom duration, hindering the capacity to initiate pharmacotherapy and new management approaches in order to prevent the occurrence or reduce the severity or duration of PCS.<sup>1,17,30</sup> The goal of this study is to derive a clinical prediction rule from key factors that is predictive of PCS development. We will identify and quantify clinically available factors at the time of ED presentation (e.g., age, mechanism of injury, symptom presence and severity, past history, physical exam) associated with PCS in children following concussion.

## Objectives

The goal of this study to derive a clinical prediction rule from key factors that is predictive of the development of PCS. We will identify and quantify clinically available factors at the time of ED presentation (e.g., age, mechanism of injury, symptom presence and severity, past history, physical exam) associated with eventual development of PCS in children following concussion. Specific objectives will be to: (1) apply standardized clinical assessments for children and adolescents following concussion across Canada; (2) determine the prevalence of PCS at one-month follow-up in children aged 5–17 years presenting for ED care following concussion. The literature regarding concussion incidence and PCS development is speculative and not based on a standardized clinical assessment. This would be the largest epidemiological cohort of concussions in the literature to date; (3) determine the interrater agreement for predictors; (4) determine the association between the clinical assessment findings and PCS presence; (5) derive a sensitive clinical prediction rule for children and adolescents with concussion to predict PCS using multivariate techniques; and, (6) determine ED physician accuracy in predicting PCS duration without using a rule; (7) determine the association, if there is one, between self-reported cognitive symptom persistence and objective neuropsychological testing; (8) determine predictors of persistent neuropsychological symptoms; (9) determine the interrater agreement for these predictors; (10) report the epidemiology of neuropsychological symptoms at 4 weeks and 12 weeks post concussion.

## Methods

### Study population

**Inclusion criteria.** Subjects presenting to one of the study hospital EDs after sustaining a head injury will be eligible if they: (1) are aged 5 to 17 years; (2) have a concussion, defined by Zurich consensus statement.<sup>3</sup>

A direct blow to the head, face, neck or elsewhere on the body with an impulsive force transmitted to the head, resulting in one or more of the symptoms in *one or more* of the following clinical domains (which may or may not have involved loss of consciousness):

- Somatic symptoms (e.g., headache, nausea, loss of balance, dizziness, sensation to light or noise, visual problems, clumsiness)
- Cognitive symptoms (e.g., feeling like in a fog, difficulty concentrating or

1  
2  
3 remembering, answering questions more slowly, confused with directions/task)  
4 - Emotional/behavioural symptoms (e.g., irritable, sad, nervous, emotional  
5 lability), physical signs (e.g. loss of consciousness, amnesia)  
6 - Sleep disturbance (e.g., sleeping more, fatigue, drowsiness, insomnia);  
7  
8 (3) suffered the initial injury in the previous 48 hours; and, (4) are proficient in  
9 English or French.  
10

11  
12 **Exclusion criteria.** Patients will be excluded if they present with traumatic head  
13 injuries with any of the following: (1) Glasgow Coma Scale  $\leq 13$ ; (2) Any abnormality  
14 on standard neuroimaging studies,<sup>3</sup> including *any* positive head computerized  
15 tomography findings (Note: neuroimaging is not required, but may be performed if  
16 believed to be clinically indicated); (3) neurosurgical operative intervention, intubation  
17 or intensive care required; (4) multi-system injuries with treatment requiring admission  
18 to hospital, operating room or procedural sedation in the ED (Note: admission to hospital  
19 for observation or management of ongoing concussion symptoms is not an exclusion  
20 criteria); (5) severe chronic neurological developmental delay resulting in  
21 communication difficulties; (6) intoxication at the time of ED presentation as per  
22 clinician judgment; (7) no clear history of trauma as primary event (e.g., seizure,  
23 syncope or migraine as primary event); or, (8) previously enrolled in this same study.  
24  
25  
26  
27

28  
29 **Patient selection.** A consecutive sample of patients with possible concussion arriving  
30 between the hours of 12:00 and 22:00 will be screened for the study. Census data from  
31 the sites reveals that less than one-fifth of pediatric concussion patients present outside of  
32 these study hours and, therefore, does not justify the additional expense of research  
33 personnel coverage. For comparative purposes, demographic and outcome data will be  
34 collected from the ED record of treatment for eligible patients who are not enrolled into  
35 the study.  
36  
37

38  
39 **Study setting.** The patients will be enrolled from the EDs of nine Canadian pediatric  
40 hospitals: IWK Health Sciences Centre (Nova Scotia), CHU Sainte-Justine (Quebec),  
41 Montreal Children's Hospital (Quebec), Children's Hospital of Eastern Ontario (Ontario),  
42 The Hospital for Sick Children (Ontario), Children's Hospital of Western Ontario  
43 (Ontario), Children's Hospital of Winnipeg (Manitoba), Stollery Children's Hospital  
44 (Alberta) and Alberta Children's Hospital (Alberta). These centers constitute 9 of the 12  
45 pediatric hospitals in Canada and have a combined annual ED census of approximately  
46 500,000 patient visits. All sites are active members of PERC and have successfully  
47 collaborated in many multicentre prospective studies. Formed in 1995, PERC is an  
48 established network of health care researchers dedicated to improving care in pediatric  
49 emergency medicine through multicentre research. The PERC network received a *2011*  
50 *CIHR-CMAJ Top Achievements in Health Research Award*<sup>32</sup> and has significant  
51 experience in decision rule derivation and validation studies including validation of  
52 decision rules for the use of radiography for children with ankle and knee injuries, and  
53 more recently in the derivation and validation of a clinical decision rule regarding the  
54 need for a CT scan in children with minor head injuries.<sup>33</sup>  
55  
56  
57  
58  
59  
60

### Standardized Patient Assessment

**Patient recruitment.** When a child aged between 5 and 17 years presents to triage/registration with a head injury, the patient's chart and/or electronic patient tracking system will be flagged as a potentially study-eligible patient. Research Assistants (RAs) located in the department will work collaboratively with the ED clinical team to also identify potential study participants. Prior to assessment by the physician, RAs will screen these patients for eligibility using brief screening questionnaire. If eligible, RAs will discuss the study with the patient and families. Eligible and willing parents, along with children and adolescents capable of consenting on their own behalf will be asked for written informed consent, and those children aged 7 or older unable to consent on their own behalf will be asked for assent. RAs will maintain a screening log of all potentially eligible patients during the study enrollment hours complete with reasons for exclusion. A second log will also be maintained of those potentially eligible patients who present outside of study enrolment hours to confirm patient characteristics are similar. These recruitment and tracking strategies have been pilot tested in our prior work and were found to be highly successful.

**Standardized patient assessment of concussion using a validated tool.** With the guidance of an RA, parent/guardian/child will answer a series of questions in electronic survey format in their first language (English or French) using a portable computer tablet. In addition to questions regarding patient demographics, both parents and children will also complete the validated Acute Concussion Evaluation (ACE)<sup>34</sup> which is embedded into the Child Sports Concussion Assessment Tool 3.<sup>3</sup> The ACE is a 22-item dichotomous evidence-based inventory for the initial evaluation and diagnosis for concussion, and has been validated as an initial concussion assessment tool for parental informants of children aged 3 to 18 years. Data are collected on injury characteristics, symptoms checklist (physical, emotional, cognitive, sleep) and past history (prior concussion, headache, developmental, psychiatric). This is to ensure that the child does not have a concussion, rather than rely solely on physician judgment. Data are collected on injury characteristics, symptoms checklist (physical, emotional, cognitive, sleep) and past history (prior concussion, headache, developmental, psychiatric). By using a validated standardized assessment we will ensure uniform application of the definition of concussion.

**Physician management and prognostication.** The treating physician will assess the child as per the normal operating procedures of the ED. Once a patient has given consent to participate in the study, the RA will liaise with the treating physician to notify them that the patient is enrolled in the concussion study. The child will remain in the normal treatment queue and participation in this study is not anticipated to lengthen their ED visit. The physician will complete a brief electronic survey on the same tablet computer. This survey will collect data about past medical history, co-morbidities, therapies received during the ED visit, discharge instructions and prognostication regarding symptom duration.

**Quality assurance.** Since data will be collected electronically via portable tablet, embedded logic safeguards will ensure variables are entered within predetermined

ranges. Warning messages will be programmed to alert for incomplete data fields. There will also be ongoing evaluation of the quality of the patient assessments judged by compliance in enrolling eligible patients. During our pilot study, 80% of eligible patients were enrolled and, to ensure similar numbers recruited, research coordinators at each site will provide clinicians with monthly feedback regarding recruitment data as well as specific review of any individual problems that may arise. Clinicians will not, however, be given any indication of the preliminary accuracy or reliability of individual variables.

**Variables from history and physical exam.** The 46 potential variables selected for assessment in the study were chosen based on expert discussions during the planning meeting, our recent systematic review, previous clinical studies by our team and clinical experience. Variables selected are listed in Table 1.

**Table 1: Potential Predictor Variables**

|                                                                                         |
|-----------------------------------------------------------------------------------------|
| Age (Years)                                                                             |
| Gender                                                                                  |
| Concussion Caused by Less Forceful mechanism (yes/no)                                   |
| Past History of Headaches requiring treatment (yes/no)                                  |
| Family history of migraine (yes/no)                                                     |
| History of Developmental or Learning problems (not severe delays) (yes/no)              |
| Previous diagnosis of ADHD (yes/no)                                                     |
| Previous diagnosis of anxiety (yes/no)                                                  |
| Previous diagnosis of depression (yes/no)                                               |
| Previous history of Medication for behavior or mood (yes/no)                            |
| GCS in ED (14 vs. 15)                                                                   |
| Pharmacotherapy in ED for pain (yes/no)                                                 |
| Pharmacotherapy in ED for nausea (yes/no)                                               |
| Mechanism of injury (sport, motor vehicle, fall, assault, other)                        |
| Protective head gear (yes/no)                                                           |
| Location of impact (Frontal, Temporal (L/R), Parietal (L/R), Occipital, Neck, Indirect) |
| Loss of consciousness                                                                   |
| Amnesia                                                                                 |
| Seizure                                                                                 |
| Appeared dazed or stunned                                                               |
| Initially confused about events                                                         |
| Answers questions slowly                                                                |
| Repeats Questions                                                                       |
| Forgetful                                                                               |
| <b>PHYSICAL</b>                                                                         |
| Headache                                                                                |
| Nausea                                                                                  |
| Vomiting                                                                                |
| Balance Problems                                                                        |
| Dizziness                                                                               |
| Visual problems                                                                         |
| Fatigue                                                                                 |
| Sensitivity to light                                                                    |



|                           |
|---------------------------|
| Sensitivity to noise      |
| Numbness/Tingling         |
| COGNITIVE                 |
| Mentally foggy            |
| Feeling Slowed down       |
| Difficulty concentrating  |
| Difficulty remembering    |
| EMOTIONAL                 |
| Irritability              |
| Sadness                   |
| More emotional            |
| Nervousness               |
| SLEEP                     |
| Drowsiness                |
| Sleeping less than normal |
| Sleeping more than normal |
| Trouble falling asleep    |

These variables were felt to be most useful in predicting whether or not patients with concussion may be at risk for developing PCS. Further, to ensure our results will be effectively compared across studies and aggregated into future meta-analyses, we will incorporate the standardized dataset recommendations from the internationally recognized National Institute of Neurological Disorders and Stroke (NINDS) Common Data Element Project.<sup>35</sup> This NIH-funded project established standards for clinical research within the neurological community on traumatic brain injury. This data set utilizes expert-consensus approved data dictionary instructions, including the preferred format for recording.

**Inter-rater reliability.** All ED physicians and research staff at each participating site will be trained on data collection methods using a standardized lecture/video and training session. A study manual including a data dictionary will be available at each site. To measure interrater reliability, five percent of patients will be assessed for clinical variables by a second physician who will be blinded to the results of the first assessment. These second assessments will be performed in all centres on a feasibility basis whenever two physicians are available in the ED.

**Follow-up.** Families will be asked to provide contact information prior to discharge. Depending on their preferences, enrolled patients will either be entered into the automated follow-up web survey using REDCap<sup>36,37</sup> or the telephone follow-up survey. For those who would prefer electronic follow-up, a link to a secure web-based questionnaire will be sent to the parental email address on Day 7 following the initial injury, and then 2-, 4-, 8- and 12-weeks post-enrolment. The same schedule and questionnaires will be used for the families that opt for telephone follow-up. In the event that patients do not complete the electronic survey within 24 hours of receipt, a second email will be sent. If there is still no response to the electronic survey, the family will be contacted by telephone for a phone interview. The follow-up questionnaires employ the validated Post-Concussion Symptom Inventory. In addition, the follow-up survey will

1  
2  
3 query symptom management, follow-up with health providers, school absenteeism,  
4 changes in academic performance, date of return to sport and school and patient/family  
5 quality of life. Our pilot established success with web-based follow-up with 91% (89/98)  
6 of patients having requested web follow-up; only two families changed from web to  
7 telephone follow-up. Patient-level assessment of longer-term outcomes (beyond 3  
8 months) is felt to be beyond the scope of this study.  
9  
10

11 **Neuropsychological Follow-up (optional).** All children from four centres (CHU Sainte-  
12 Justine, Montreal Children's Hospital, Children's Hospital of Eastern Ontario, The  
13 Hospital for Sick Children) will be offered enrolment in an optional neuropsychological  
14 arm of the study at the time of their initial consent by the on-site trained research  
15 assistant. This will involve two return visits to the centre, at 4 weeks and 12 weeks post  
16 concussion. Each visit will be approximately 2 ½ hours in length, during which we will  
17 measure the mental and social capacities of children and adolescents who have suffered a  
18 concussion. This data will be gathered using questionnaires and tests in their first  
19 language (English or French) designed to measure mental skills and behaviour in two  
20 ways: 1) indicators of behaviour and functional abilities, and 2) measurements of mental  
21 and social skills. These measures will be administered by a research assistant that is fully  
22 trained in psychometry. The results of these assessments will be reviewed and interpreted  
23 by a licensed neuropsychologist, who will follow up with any significant clinical  
24 concerns and refer appropriately. In cases of significant clinical concerns arising at the 4  
25 week assessment, the patient and parents will be notified. A summary written report will  
26 be issued after completion of the 12 week assessment, again, with appropriate follow-up  
27 indicated if necessary.  
28  
29  
30  
31  
32

33 **Primary outcome measure.** The primary outcome is the proportion of children aged 5 –  
34 17 years who have PCS at one-month follow-up. A PCS case is defined as an increase  
35 from pre- concussion baseline of three or more symptoms on the validated PCSI at one-  
36 month (consistent with the ICD-10 definition of PCS).  
37  
38

39 **Post-Concussion Symptom Inventory (PCSI).** The PCSI is a set of symptom scales for  
40 parents (26-item, 7-point Likert scale) and developmentally specific self-report forms for  
41 children ages 5-7 years (13 items, 3 point Likert), ages 8–12 years (25- item, 3 point  
42 Likert scale) and 13–18 year olds (26-item, 7-point Likert scale). The PCSI is only one  
43 of two measures applicable to younger children which has both validity and reliability  
44 data published in the literature.<sup>34,38,39</sup> The PCSI queries symptoms reflecting physical,  
45 cognitive, emotional and sleep domains. Even with younger children, there is excellent  
46 internal consistency with the PCSI (age 5–7  $r=0.76$ ; age 8–12  $r=0.87$ ).<sup>38</sup> Interrater  
47 agreement has also been examined comparing symptoms ratings from the child and  
48 parent. At enrolment, patients and parents will complete an inventory of symptoms that  
49 were present prior to the injury (72 hours prior to enrolment) to establish a patient  
50 baseline. Since each case of PCS is defined as a change from an individual's baseline in  
51 three or more symptoms, total summation of subunits is not required for PCSI scoring.  
52 Therefore, it is not problematic that there are different item values or totals across age  
53 groups. Symptom severity (mild-moderate-severe) at the time of ED presentation will  
54 also be analyzed as a potential predictor of symptom duration.  
55  
56  
57  
58  
59  
60

## Secondary outcomes measures

**Pediatric Quality of Life Inventory (PedsQL™).** Standard pediatric practice requires involvement of parents. The role of the family is crucial to the recovery process and delayed recovery from concussion has been shown to impact the quality of life of the patient and the family.<sup>9,16,17</sup> The PedsQL™ is a reliable and valid measure of health-related quality of life in healthy children and adolescents and those with acute and/or chronic health conditions.<sup>35</sup> Parent versions exist for children aged 2 to 18 years (in 4 age groups) and child versions for those aged 5 and over. The inventory covers four domains: physical, emotional, social and school (8-, 5-, 5- and 5 items, respectively), and takes approximately 4 minutes to complete. This secondary outcome measure will be used to determine the impact of PCS on quality of life on patients and families.

**Neuropsychological Evaluation.** A separate battery of neuropsychological assessment measures will be administered to those children who choose to participate in this arm of the study (see Table 1). This battery includes measures of intelligence, language, visual-spatial/motor functions, attention, memory/working memory, executive functioning, academic achievement, as well as behavioural/socioemotional functioning.

**Wechsler Abbreviated Scale of Intelligence.**<sup>40</sup> The Wechsler Abbreviated Scale of Intelligence is a reliable and valid measure of intellectual functioning in children and adults. The Wechsler Abbreviated Scale of Intelligence consists of four subtests, which provide estimates of the Full Scale Intelligence Quotient, the Verbal Intelligence Quotient (based on Vocabulary and Similarities subtests) and Performance Intelligence Quotient (based on Block Design and Matrix Reasoning subtests). It takes approximately 30 minutes to administer this measure.

**Delis Kaplan Executive Functioning System.**<sup>41</sup> The Delis Kaplan Executive Functioning System is a reliable and valid measure of executive functioning in children and adults. It consists of many subtests, of which we will use three. The Trails subtest measures the ability to complete several visual spatial sequences, including numbers and letters in a mixed array as quickly as possible. The Verbal Fluency subtest asks the participant to generate as many words as possible in one minute that either begin with a specific letter of the alphabet, fit in a specific category, or that switches between two categories. That Color-Word Interference Test measures the participant's ability to inhibit a dominant and automatic verbal response when reading the names of colours that are printed in a variety of ink colours. It takes approximately 20 minutes to administer these subtests.

**Digit Span and Coding subtest of the Wechsler Intelligence Scale for Children – Fourth Edition)/Wechsler Adult Intelligence Scale – Fourth Edition.**<sup>42-44</sup> The Digit Span and Coding subtests are reliable and valid measures of short-term memory/working memory and speed of information processing in children and adults. The Digit Span subtest measures the participant's ability to repeat numbers read aloud by the examiner in a forward and backward order (for participants age 16 or older, the ability to sequence a series of numbers will also be assessed). The Coding subtest requires the participant to reproduce symbols in a sequence as quickly as possible. It takes approximately 10 minutes to administer these subtests.

1  
2  
3  
4  
5  
6  
7  
8  
9  
10  
**Rey-Osterrieth Complex Figure Test.**<sup>45</sup> The Rey-Osterrieth Complex Figure Test is a reliable and valid measure of visual spatial and executive functioning in children and adults. The participant is asked to reproduce the complex figure with it initially in front of her/him. The participant is then asked to reproduce it from memory immediately after, as well as 30 minutes after the initial reproduction. It takes approximately 10 minutes to administer this test.

11  
12  
13  
14  
15  
**Dynamometer (Grip Strength Test).**<sup>46</sup> The Dynamometer test is a reliable and valid measure of the grip strength in children and adults. The participant is asked to squeeze the dynamometer with the dominant hand, followed by the nondominant hand. It takes approximately 5 minutes to administer this test.

16  
17  
18  
19  
20  
**Grooved Pegboard Test.**<sup>47</sup> The Grooved Pegboard Test is a reliable and valid measure of speeded eye-hand dexterity in children and adults. The participant is asked to place key-shaped pegs in a pegboard as quickly as possible with the dominant hand, followed by the nondominant hand. It takes approximately 10 minutes to administer this test.

21  
22  
23  
24  
25  
26  
**Conner's Continuous Performance Test – Second Edition, Version Five.**<sup>48</sup> The Conner's Continuous Performance Test is a task oriented computerized assessment of attentional functioning in children and adults. The participant is asked to respond to some characters on the computer screen and not to respond to other characters. It takes approximately 15 minutes to administer this test.

27  
28  
29  
30  
31  
32  
33  
**California Verbal Learning Test for Children/California Verbal Learning Test – Second Edition.**<sup>49,50</sup> The California Verbal Learning Test is a reliable and valid measure of verbal learning and memory in children and adults. A lengthy list of words is read aloud to the participant a total of five times, with recall after each presentation. Long-term recall is also assessed. It takes approximately 20 minutes to administer this test.

34  
35  
36  
37  
38  
39  
40  
**Wechsler Individual Achievement Test – Second Edition.**<sup>44</sup> The Wechsler Individual Achievement Test is a reliable and valid measure of academic achievement in children and adults, normed in both official languages of Canada. The participant is asked to read a series of words, to respond to questions assessing reading comprehension and to complete a series of mechanical arithmetic. It takes approximately 30 minutes to administer this test.

41  
42  
43  
44  
**Child Behavior Checklist.**<sup>51</sup> The Child Behavior Checklist is a reliable and valid parent questionnaire assessing their child's functioning in emotional, social, cognitive and behavioural domains. It takes approximately 20 minutes to complete this test.

45  
46  
47  
48  
49  
**Conners' Rating Scale – Third Edition.**<sup>52</sup> The Conner's Rating Scale is a reliable and valid parent questionnaire assessing their child's functioning in emotional, social, cognitive and behavioural domains. The emphasis of this measure is attentional in nature. It takes approximately 15 minutes to complete this test.

50  
51  
52  
53  
**Behavioral Rating Inventory of Executive Function.**<sup>53</sup> The Behavioral Rating Inventory of Executive Function is a reliable and valid parent questionnaire assessing their child's executive functioning. It takes approximately 15 minutes to complete this test.

54  
55  
56  
57  
58  
59  
60  
**Strength and Difficulties Questionnaire.**<sup>54</sup> The Strength and Difficulties Questionnaire is a reliable and valid parent questionnaire assessing their child's

1  
2  
3 emotional symptoms, conduct problems, hyperactivity/inattention, peer relationships and  
4 prosocial behaviour. It takes approximately 10 minutes to complete this test.  
5  
6

## 7 **Data Analysis**

9  
10 **Interrater Agreement.** The interrater agreement for each variable will be assessed using  
11 a kappa coefficient, the proportion of potential agreement beyond chance, along with  
12 95% confidence intervals.<sup>55,56</sup> For variables with three or more ordered categories, a  
13 weighted kappa measure of interrater agreement will be calculated.<sup>57</sup> A variable will be  
14 deemed to have acceptable agreement if the kappa coefficient has a value of at least  
15 0.6.<sup>55,56</sup>  
16

17  
18 **Univariate analysis.** Univariate analyses will be used to determine the strength of  
19 association between each variable and the primary outcome, PCS. This process will aid  
20 selection of the best variables for the multivariate analyses. The appropriate univariate  
21 technique will be chosen according to the type of data: for nominal data, a chi-square test  
22 with continuity correction; for ordinal variables, a Mann-Whitney U test; and, for  
23 continuous variables, an unpaired 2-tailed t-test, using pooled or separate variance  
24 estimates, as appropriate.  
25  
26

27  
28 **Multivariate analysis.** Multivariate analysis will be used to derive a predictive model  
29 for PCS. Variables found to be both reliable (kappa>0.6) and independently associated  
30 with the outcome (p<0.2) will be used as input to a multivariate logistic regression.  
31 Model fit will be assessed using the Hosmer-Lemeshow test and Nagelkerke's pseudo-R<sup>2</sup>.  
32

33 An alternate strategy for deriving a predictive model is recursive partitioning. This  
34 approach has been recommended for deriving highly sensitive predictive models while  
35 logistic regression may produce better predictive accuracy.<sup>58</sup> However, high sensitivity is  
36 not the primary goal in the proposed study. Further, a fitted logistic regression model has  
37 the advantage that it can be used to derive a risk score using a points system.<sup>59</sup> For these  
38 reasons, logistic regression was chosen as the primary analytic approach.

39 The objective of the logistic regression analysis will be to find the best combinations  
40 of variables for accurately predicting PCS. Receiver operating characteristic (ROC)  
41 curves will be used to assess the tradeoff between sensitivity and specificity based on  
42 applying different probability thresholds to the fitted model. The derived models must be  
43 easy to use by clinicians and therefore should contain as few variables as possible. As  
44 described in a recent systematic review of pediatric clinical prediction rules, "Seeking  
45 95% sensitivity for clinical prediction rules for child health conditions may be an elusive  
46 and counterproductive goal, especially when the sensitivity of a less-than-perfect clinical  
47 prediction rule is superior to a clinician's judgment alone (p. e671).<sup>60</sup> Assuming more  
48 than one model meets the minimum acceptable criteria, the **best model** will be the one  
49 which has the highest PPV/sensitivity and the fewest number of component variables.  
50  
51  
52

53 **Classification performance.** The derived prediction rule will be cross-validated by  
54 comparing the classification of each patient to their actual status for the primary outcome.  
55 This will allow an estimate, with 95% confidence intervals computed using the Wilson  
56  
57  
58  
59  
60

score method, of the sensitivity and specificity of the rule. A more robust validation will be carried out prospectively on a new set of patients in Phase II.

**Physician judgment.** Physicians will be asked to predict likelihood of PCS using a Likert scale. Data from those predictions will be tabulated in descriptive format. Information on the predicted probabilities will be used to calculate receiver operating characteristic curves and likelihood ratios for determining the duration of symptom persistence. The accuracy of the physicians' predictions will be compared to that of the derived prediction rule by the receiver operating characteristic curve analysis.

**Sample size.** A well-supported recommendation for the development of a predictive model is that ten events are required for each candidate variable.<sup>61,62</sup> Further, a recent systematic review examining the methodology of clinical prediction rule studies endorses this recommendation.<sup>63</sup> Based on preliminary work, we identified 46 potential predictor variables (See Table 1). Our pilot demonstrated 25% of patients had PCS (as per ICD-10 definition of three or more symptoms at 1 month). After screening for interrater agreement (we assumed a 25% dropout of variables based on our CT head rule derivation<sup>33</sup>), we would require 345 PCS cases (10 cases per predictor variable after kappa screening). In order to obtain 345 PCS cases, we would need to enroll 1380 new concussions. Assuming a comparable 23% loss to follow-up at one month, we would require a sample size of 1792 patients.

### Methodological considerations

**Alternate definition of PCS case considered.** The timing discrepancy between DSM-IV and ICD-10 definitions of PCS are conceded to be a shortcoming in the literature.<sup>12</sup> While DSM-IV criteria defines a case as persistent symptoms at 3-month duration, experts at our 2-day planning meeting determined that one month of persistent symptomatology was the most clinically relevant outcome (ICS-10 criteria). Both definitions require the presence of multiple symptoms as compared to baseline. Preliminary data from our pilot study confirmed that most children with PCS have changes from baseline for multiple symptoms rather than for just one or two symptoms.

**Alternate analysis considered.** Recursive partitioning has been widely used in the development of clinical prediction rules and recursive partitioning may be more suitable than logistic regression when the objective is to correctly classify one outcome group at the expense of the other.<sup>33</sup> Recursive partitioning creates a binary decision tree by automatically splitting on values of input variables so as to achieve optimal classification of an outcome variable.<sup>64</sup> However, predictive models are likely better developed as risk scales with points based upon logistic regression analyses. The use of risk scales gives the probability of outcomes; clinicians are then able to choose their own cut points for action.

### Ethics and Dissemination

Ethics has been obtained through the Children's Hospital of Eastern Ontario Research Ethics Board (No 13/94X). This study poses little to no risk to participating patients and

1  
2  
3 their families. Patients will receive standard care in the ED. Participation in the study  
4 will not negatively impact or restrict them from receiving additional assessments,  
5 investigations (CT, MRI), consultations or management, as determined by treating  
6 physicians. Risks to patient and family only exist in the realm of security and privacy of  
7 their data including responses to various questionnaires used to identify prognosticators  
8 for PCS. Research personnel will take all appropriate and customary steps to ensure that  
9 data remains secure and that patient privacy and confidentiality are maintained. All  
10 patients and families will provide written informed consent/assent and will have the  
11 ability to withdraw at any time without explanation.  
12

13  
14 Results will be disseminated at international conferences and in manuscripts to peer  
15 reviewed journals. Publications topics will include: epidemiology of PCS at one-month  
16 follow-up in children aged 5–17 years presenting for ED care following concussion (the  
17 largest epidemiological cohort of concussions in the literature to date; derivation of a  
18 sensitive clinical prediction rule for children and adolescents with concussion to predict  
19 PCS using multivariate techniques; epidemiology of neuropsychological symptoms at 1  
20 and 3 months post concussion; and the association between self-reported cognitive  
21 symptom persistence and objective neuropsychological testing.  
22

23  
24 We need rigorous evidence about incidence of PCS in children and its impact on the  
25 quality of life for both children and families. Validated, easy-to-use prognosticators do  
26 not exist for clinicians to identify children with concussion who are at highest risk for  
27 PCS and sequelae. Physicians currently lack the ability to accurately inform children and  
28 parents whether they should expect longer symptoms. A clinical prediction rule would  
29 allow physicians to determine who would most likely benefit from potential  
30 interventions, allow physicians to quickly initiate best care post-mild traumatic brain  
31 injury and permit concussion research to move forward.  
32

33  
34 With identification of high-risk patients for PCS, clinical trials may commence to  
35 ameliorate or possibly prevent persistent symptomatology. The literature is ripe with  
36 promising pilot trials of pharmacotherapeutic interventions in patients who have suffered  
37 moderate-to-severe traumatic brain injury (e.g., amantidine, progesterone, magnesium)<sup>65-  
38 67</sup> as well as promising rehabilitation interventions.<sup>68-69</sup> Prior to a large randomised  
39 double-blind interventional trial in children and adolescents presenting with a concussion,  
40 it is imperative for ethical considerations that only high-risk patients be selected for trials  
41 of pharmacotherapeutic agents with potential for significant side-effect profiles.<sup>70</sup>  
42 Further, other than expert-consensus on graduated return-to-play guidelines, there is  
43 minimal trial-based evidence regarding the ideal non-pharmacologic or rehabilitation  
44 management of persistent symptoms; our study is fundamental to future interventional  
45 trials. We still do not know the ideal approaches to return to school and sport.<sup>1,70</sup> Results  
46 from our study will permit future concussion trials to answer these and similar questions  
47 by targeting patients most likely to benefit. In short, our proposed research is necessary  
48 to allow concussion research to move forward.  
49

50  
51 Further, evidence supports the benefit of early education with coping mechanisms to  
52 reduce PCS.<sup>71,72</sup> Therefore, front-line primary care and emergency physicians need to be  
53 able to provide accurate counseling to families and patients following concussion and  
54 timely specialist referral based on risk stratification. Our pilot data demonstrated parental  
55 anxiety remained amplified while their children remained symptomatic.<sup>73</sup> Results from  
56  
57  
58  
59  
60

1  
2  
3 this proposed study could be used to improve anticipatory guidance to parents and to  
4 offer expectation management and coping mechanisms.

5  
6 Finally, despite improved recognition of sport-related concussion in adolescents over  
7 the past decade, little attention has been given to younger children.<sup>38</sup> Our study will  
8 generate epidemiologic data on younger children and other overlooked populations (e.g.,  
9 non-sports related concussions, girls, minor behavioural or developmental problems such  
10 as Attention Deficit Hyperactivity Disorder).

11  
12  
13 **Abbreviations:**

14 PCS, post-concussive symptoms

15 ED, emergency department

16 PERC, Pediatric Emergency Research Canada

17 ACE, Acute Concussion Evaluation

18 PCSI, Post-Concussion Symptom Inventory

19 DSM-IV, Diagnostic and Statistical Manual of Mental Disorders,

20 ICD, International Classification of Diseases  
21  
22  
23

24  
25 **Authors Contributions:**

26 RZ, MO and NB led the study concept, design, selected outcome measures, and grant  
27 writing. RZ wrote the first draft of the manuscript. All authors read, critically revised and  
28 approved the final manuscript.  
29

30  
31 **Funding**

32 This study is supported by a Canadian Institute of Health Research (CIHR) Operating  
33 Grant (MOP: #126197) as well as by a Canadian Institute of Health Research (CIHR)  
34 mild Traumatic Brain Injury Team Grant (TM1: #127047).  
35

36 **Competing Interests:** None.  
37

38  
39 **Ethics Approval:** Ethics has been obtained through the Children's Hospital of Eastern  
40 Ontario Research Ethics Board (No 13/94X).  
41  
42

43  
44 **REFERENCES**  
45

- 46  
47 1. Rivara F. Concussion: Time to start paying attention. *Arch Ped Adol Med*  
48 2012;166(7):666-7.  
49 2. Meehan W, Bachur R. Sport-related concussion. *Pediatrics* 2009;123(1):114-23.  
50 3. McCrory P, Meeuwisse W, Aubry M, et al. Consensus statement on concussion in  
51 sport: The 4<sup>th</sup> International Conference on Concussion in Sport held in Zurich, November  
52 2012. *Br J Sports Med* 2013;47:250-258.  
53 4. Meehan W, Mannix R. Pediatric concussions in United States emergency departments  
54 in the years 2002 to 2006. *J Pediatr* 2010;157:889-93.  
55  
56  
57  
58  
59  
60



5. Emery C, Kang J, Shrier I, et al. Risk of injury associated with bodychecking experience among youth hockey players. *CMAJ* 2011;183(11):1249-56.
6. National Center for Injury Prevention and Control. Traumatic Brain injury in the United States: Emergency department visits, hospitalizations and deaths 2002-2006. Atlanta, GA: Centers for Disease Control and Prevention; 2010.
7. Langlois J, Rutland-Brown W, Wald M. The epidemiology and impact of traumatic brain injury. *J Head Trauma Rehabil* 2006;21:375-8.
8. National Center for Injury Prevention and Control. Report to Congress on Mild Traumatic Brain Injury in the United States: Steps to Prevent a Serious Public Health Problem. Atlanta, GA: Centers for Disease Control and Prevention, 2003.
9. Yeates KO, Kaizar E, Rusin J, et al. Reliable change in postconcussive symptoms and its functional consequences among children with mild traumatic brain injury. *Arch Pediatr Adol Med* 2012;166(7):615-22.
10. Belanger H, Vanderploeg R. The neuropsychological impact of sports-related concussion: A meta-analysis. *J Int Neuropsychol Soc* 2005;11(4):345-57.
11. Zafonte R. Diagnosis and management of sports-related concussion. *JAMA* 2011;306(1):79-86.
12. Ayr L, Yeates K, Taylor H, et al. Dimensions of postconcussive symptoms in children with mild traumatic brain injuries. *J Int Neuropsychol Soc* 2009;15:19-30.
13. Burton L, Quinn B, Pratt-Cheney J, et al. Headache etiology in a pediatric emergency department. *Pediatr Emerg Care* 1997;13(1):1-4.
14. Yeates K, Luria J, Bartkowski H, et al. Postconcussive symptoms in children with mild closed head injuries. *J Head Trauma Rehabil* 1999;14(4):337-50.
15. Barlow K, Crawford S, Stevenson A, et al. Epidemiology of postconcussion syndrome in pediatric mild traumatic brain injury. *Pediatrics* 2010;126:e374-81.
16. Carroll L, Rosner D. *The Concussion Crisis: Anatomy of a Silent Epidemic*. Simon & Schuster, 2011.
17. Scorza K, Raleigh M, O'Connor F. Current concepts in concussion: Evaluation and management. *Am Fam Physician* 2012;85(2):123-32.
18. Korinthenberg R, Schreck J, Weser J, et al. Post-traumatic syndrome after minor head injury cannot be predicted by neurological investigations. *Brain Dev* 2004;26(2):113-7.
19. Babikian T, Satz P, Zaucha K, et al. The UCLA Longitudinal Study of neurocognitive outcomes following mild pediatric traumatic brain injury. *J Int Neuropsychol Soc* 2011;17:886-95.
20. Forsyth R, Kirkham F. Predicting outcome after childhood brain injury. *CMAJ* 2012;184(11):1257-64.
21. Anderson V, Brown S, Newitt H, et al. Educational, vocational, psychosocial, and quality-of-life outcomes for adult survivors of childhood traumatic brain injury. *J Head Trauma Rehabil* 2009;24(5):303-12.
22. Anderson V, Jacobs R, Spencer-Smith M, et al. Does early age at brain insult predict worse outcome? Neuropsychological implications. *J Pediatr Psychol* 2010;35(7):716-27.
23. Meehan W, Zhang J, Mannix R, et al. Increasing recovery time between injuries improves cognitive outcome after repetitive mild concussive brain injuries in mice. [published online ahead of print June 27 2012]. *Neurosurg* 2012. doi: 10.1227/NEU.0b013e318265a439

24. Guskiewicz K, Marshall S, Bailes J, et al. Association between recurrent concussion and late-life cognitive impairment in retired professional football players. *Neurosurgery* 2005;57(4):719-26.
25. Gaetz M, Goodman D, Weinberg H. Electrophysiological evidence for the cumulative effects of concussion. *Brain Inj* 2000;14:1077-88.
26. Gronwall D, Wrightson P. Cumulative effects of concussion. *Lancet* 1975;2:995-7.
27. Matser E, Kessels A, Lezak M, et al. Cumulative problems with memory and planning in amateur soccer. *JAMA* 1999;282:971-3.
28. Marchie A, Cusimano M. Bodychecking and concussions in ice hockey: Should our youth pay the price? *CMAJ* 2003;169(2):124-8.
29. Swaine B, Tremblay C, Platt R, et al. Previous head injury is risk factor for subsequent head injury in children: A longitudinal cohort study. *Pediatrics* 2007;119:749-58.
30. Zemek R, Farion K, Sampson M, et al. Prognosticators of persistent symptoms following pediatric concussion: A systematic review. *JAMA Pediatrics* 2013; 167(3):259-65.
31. Callahan J. Pediatric concussions in United States emergency departments: The tip of the iceberg. *J Pediatr* 2010;157(6):873-5.
32. Kelsall D. Celebrating top achievements in health research 2011. *CMAJ* 2012;184:189-91.
33. Osmond M, Klassen T, Wells G, et al. CATCH: A clinical decision rule for the use of computed tomography in children with minor head injury. *CMAJ* 2010;182:341-8.
34. Gioia G, Schneider J, Vaughan C, et al. (2009). Which symptom assessments and approaches are uniquely appropriate for paediatric concussion? *Br J Sports Med* 2009;43(Suppl 1):i13-i22.
35. Adelson PD, Pineda J, Bell MJ, et al. Common data elements for pediatric traumatic brain injury: Recommendations from the working group on demographics and clinical assessment. *J Neurotrauma* 2012;29(4):639-53.
36. Harris P, Taylor R, Thielke R, et al. Research electronic data capture (REDCap): A metadata-driven methodology and workflow process for providing translational research informatics support. *J Biomedical Infor* 2009;42(2):377-81.
37. Vanderbilt University. REDCap. <http://project-redcap.org/>. Published January, 2012. Accessed September, 2012.
38. Gioia G, Isquith P, Schneider J, et al. New approaches to assessment and monitoring of concussion in children. *Top Lang Disorders* 2009;29(3):266-81.
39. Gioia G, Janusz J, Isquith P, et al. Psychometric properties of the parent and teacher Post-Concussion Symptom Inventory (PCSI) for children and adolescents. *Journal of the International Neuropsychological Society* 2008;14(Suppl 1):204.
40. Wechsler, D. Wechsler Abbreviated Scale of Intelligence—Second Edition Manual. Bloomington, MN: Pearson, 2011.
41. Delis, D. C., Kaplan, E., & Kramer, J. H. Delis-Kaplan Executive Function System (D-KEFS). San Antonio, TX: The Psychological Corporation. 2001.
42. Wechsler, D. The Wechsler intelligence scale for children—fourth edition. San Antonio: Pearson Assessment, 2004.
43. Wechsler, D. The Wechsler adult intelligence scale —fourth edition. San Antonio: Pearson Assessment, 2008.

- 1
- 2
- 3
- 4 44. Wechsler, D. The Wechsler individual achievement test – second edition. San
- 5 Antonio : Pearson Assessment, 2001.
- 6 45. Osterrieth, PS. Le test de copie d'une figure complex: Contribution à l'étude de la
- 7 perception et de la memoir. Archives de Psychologie, 1944 ;30 :286–356
- 8 46. Dynamometer - Lafayette Instruments, Lafayette, IN
- 9 47. Grooved Pegboard Test - Lafayette Instruments, Lafayette, IN
- 10 48. Conners, CK. Conners' Continuous Performance Test II (CPT II V.5); Toronto:
- 11 MHS, 2004.
- 12 49. Delis, DC, Kramer, JH, Kaplan, E, et al. California verbal learning test – second
- 13 edition, San Antonio, Pearson. 2000.
- 14 50. Delis, DC, Kramer, JH, Kaplan, E, et al. California verbal learning test – children's
- 15 version, San Antonio, Pearson, 1994.
- 16 51. Achenbach, T. M., & Rescorla, L. A. Manual for the ASEBA School-Age Forms &
- 17 Profiles. Burlington, VT: University of Vermont, Research Center for Children, Youth, &
- 18 Families, 2001.
- 19 52. Conners, CK. Conners third edition. Toronto, MHS, 2008.
- 20 53. Gioia, GA, Isquith, PK, Guy, SC, et al. Behavioral Rating Inventory for Executive
- 21 Functioning. Lutz, FLA: PAR, 2000.
- 22 54. Goodman R The extended version of the Strengths and Difficulties Questionnaire as
- 23 a guide to child psychiatric caseness and consequent burden. Journal of Child Psychology
- 24 and Psychiatry, 1999;40:791-801.
- 25 55. Kramer MS, Feinstein AR. Clinical biostatistics: LIV. The biostatistics of
- 26 concordance. Clin Pharmacol Ther 1982; 29:111-123.
- 27 56. Landis JR, Koch GG. The measurement of observer agreement for categorical data.
- 28 Biometrics 1977; 33:159-174.
- 29 57. Fleiss JL. Statistical methods for rates and proportions. 2<sup>nd</sup> ed. New York: John
- 30 Wiley & Sons, 1981.
- 31 58. Stiell I, Wells G. Methodologic standards for the development of clinical decision
- 32 rules in emergency medicine. Ann Emerg Med 1999;33(4):437-47.
- 33 59. Sullivan L, Massaro J, D'Agostino R. Presentation of multivariate data for clinical
- 34 use: The Framingham Study risk score functions. Stat Med. 2004 May 30;23(10):1631-
- 35 60.
- 36 60. Maguire J, Kulik D, Laupacis A, et al. Clinical prediction rules for children: A
- 37 systematic review. Pediatrics 2011;128(3):e666-77.
- 38 61. Harrell F, Lee K, Mark D. Multivariable prognostic models: Issues in developing
- 39 models, evaluating assumptions and adequacy, and measuring and reducing errors. Stat
- 40 Med 1996;28;15(4):361-87.
- 41 62. Peduzzi P, Concato J, Kemper E, et al. A simulation study of the number of events
- 42 per variable in logistic regression analysis. J Clin Epidemiol 1996;49(12):1373-9.
- 43 63. Bouwmeester W, Zuithoff N, Mallett S, et al. Reporting and methods in clinical
- 44 prediction research: A systematic review. PLOS Med 2012;9(5):e1001221.
- 45 doi:10.1371/journal.pmed.1001221
- 46 64. Breiman L, Friedman J, Olshen, R, et al. Classification and Regression Trees.
- 47 Wadsworth, Belmont, CA., 1983.
- 48 65. Giacino J, Whyte J, Bagiella E, et al. Placebo-controlled trial of amantadine for
- 49 severe traumatic brain injury. N Engl J Med 2012;366(9):819-26.
- 50
- 51
- 52
- 53
- 54
- 55
- 56
- 57
- 58
- 59
- 60

- 1  
2  
3  
4  
5  
6  
7  
8  
9  
10  
11  
12  
13  
14  
15  
16  
17  
18  
19  
20  
21  
22  
23  
24  
25  
26  
27  
28  
29  
30  
31  
32  
33  
34  
35  
36  
37  
38  
39  
40  
41  
42  
43  
44  
45  
46  
47  
48  
49  
50  
51  
52  
53  
54  
55  
56  
57  
58  
59  
60
66. Junpeng M, Huang S, Qin S. Progesterone for acute traumatic brain injury. *Cochrane Database Syst Rev.* 2011;(1):CD008409.
67. Sen A, Gulati A. Use of magnesium in traumatic brain injury. *Neurotherapeutics.* 2010;7(1):91-9.
68. Gagnon, I., C. Galli, et al. Active rehabilitation for children who are slow to recover following sport-related concussion. *Brain Injury* 2009;23(12):956-964.
69. Leddy, J. J., K. Kozlowski, et al. A Preliminary Study of Subsymptom Threshold Exercise Training for Refractory Post-Concussion Syndrome. *Clin J Sport Med* 2010;20(1): 21-27.
70. Meehan W. Medical therapies for concussion. *Clin Sports Med* 2011;30(1):115-24.
71. Ponsford J, Willmott C, Rothwell A, et al. Impact of early intervention on outcome following mild head injury in adults. *J Neurol Neurosurg Psychiatr* 2002;73:330–2.
72. Ponsford J, Willmott C, Rothwell A, et al. Impact of early intervention on outcome after mild traumatic brain injury in children. *Pediatrics.* 2001;108:1297–303.
73. Zemek R, Clarkin C, Farion F, et al. Parental anxiety at initial ED presentation is not predictive of prolonged symptoms following pediatric concussion. *Acad Emerg Med.* (accepted June 6, 2013)
